# Mangiferin attenuates lipopolysaccharide-induced neuronal injuries in primary cultured hippocampal neurons

Hongling Tan<sup>1</sup>, Dan Liang<sup>1</sup>, Na Lu<sup>2</sup>, Junli Zhang<sup>1</sup>, Shiyan Zhang<sup>3</sup>, Guojun Tan<sup>4</sup>

<sup>1</sup>Department of Emergency Intensive Care Medicine, The Second Hospital of Hebei Medical University, Shijiazhuang 050000, China

<sup>2</sup>Department of Emergency Intensive Care Medicine, The First Hospital of Hebei Medical University, Shijiazhuang 050000, China

<sup>3</sup>Department of Medical, The Second Hospital of Hebei Medical University, Shijiazhuang 050000, China

<sup>4</sup>Department of Neurology, The Second Hospital of Hebei Medical University, Shijiazhuang 050000, China

Correspondence to: Guojun Tan; email: [26500793@hebmu.edu.cn](mailto:26500793@hebmu.edu.cn)

Keywords: mangiferin, sepsis, sepsis-associated encephalopathy, lipopolysaccharide, neuron

Received: January 19, 2024

Accepted: April 10, 2024

Published: May 15, 2024

Copyright: © 2024 Tan et al. This is an open access article distributed under the terms of the [Creative Commons Attribution License](https://creativecommons.org/licenses/by/4.0/) (CC BY 4.0), which permits unrestricted use, distribution, and reproduction in any medium, provided the original author and source are credited.

## ABSTRACT

Mangiferin, a naturally occurring potent glucosylxanthone, is mainly isolated from the *Mangifera indica* plant and shows potential pharmacological properties, including anti-bacterial, anti-inflammation, and antioxidant in sepsis-induced lung and kidney injury. However, there was a puzzle as to whether mangiferin had a protective effect on sepsis-associated encephalopathy. To answer this question, we established an *in vitro* cell model of sepsis-associated encephalopathy and investigated the neuroprotective effects of mangiferin in primary cultured hippocampal neurons challenged with lipopolysaccharide (LPS). Neurons treated with 20  $\mu\text{mol/L}$  or 40  $\mu\text{mol/L}$  mangiferin for 48 h can significantly reverse cell injuries induced by LPS treatment, including improved cell viability, decreased inflammatory cytokines secretion, relief of microtubule-associated light chain 3 expression levels and several autophagosomes, as well as attenuated cell apoptosis. Furthermore, mangiferin eliminated pathogenic proteins and elevated neuroprotective factors at both the mRNA and protein levels, showing strong neuroprotective effects of mangiferin, including anti-inflammatory, anti-autophagy, and anti-apoptotic effects on neurons *in vitro*.

## INTRODUCTION

Sepsis is a syndrome characterized by multiple organ dysfunction and a systemic inflammatory response caused by an infection that induces acute and long-term cognitive impairment [1]. Despite recent advances in anti-infection therapy and organ function support technology, the mortality rate from sepsis remains as high as 30–60% [2]. The central nervous system is particularly susceptible to the harmful effects of sepsis due to its high metabolic rate and blood-brain barrier (BBB) permeability [3]. Sepsis-associated encephalopathy (SAE) has various clinical manifestations, ranging from psychological dysfunctions such as anxiety, depression, and post-

traumatic stress disorder to cognitive impairments such as memory decline and difficulty performing tasks, delirium, coma, or even death [4]. The pathophysiology of SAE has not been fully elucidated. Several commonly accepted mechanisms include impaired cerebral perfusion, altered neurotransmitters, impaired BBB, oxidative stress, inflammatory response, apoptosis, microglial activation, and metabolic disorders [5].

In addition to surgical administration, traditional Chinese medicinal compounds with anti-oxidant and anti-inflammatory effects have been considered potential therapeutic candidates for sepsis-induced organ dysfunction. Mangiferin (the C-glucopyranoside of 1,3,6,7-tetrahydroxyxanthone), a yellow poly-

phenolic natural product, has been widely studied for its pharmacological properties [6]. Mangiferin exhibits a range of pharmacological activities, including antioxidant, antiviral, immunomodulatory, antibacterial, anti-parasitic, anti-cancer, anti-diabetic, anti-asthmatic, hepatoprotective, anti-septic, anti-inflammatory activities, etc. [7–10]. Although mangiferin may not directly traverse the BBB, its secondary effect on brain metabolism [11] is effective in the treatment of neurodegenerative disorders [12] and cerebral ischemia-reperfusion injury [13]. In lipopolysaccharide (LPS)-induced sepsis-associated lung and kidney injuries, mangiferin also exhibits protective roles by downregulating vascular permeability and protecting against inflammatory and oxidative damage [7, 14, 15]. This comprehensive study focused on the effects of mangiferin on different signaling pathways, including phosphatidylinositol 3-kinase (PI3K)/protein kinase B (Akt), nuclear factor erythroid 2-like 2 (Nrf2)/heme oxygenase-1 (HO-1), and extracellular signal-regulated kinase1/2 (ERK1/2) [13]. However, the protective effects of mangiferin against LPS-induced neuronal damage and the underlying mechanisms have not yet been fully characterized. In this study, we investigated the protective effects of mangiferin against LPS-induced neuronal damage *in vitro* and explored the potential mechanisms underlying these effects. Mangiferin-treated neurons showed a significant reversal of LPS-induced cell injury, including improved cell viability and decreased inflammatory cytokine secretion. In addition, the anti-autophagic and anti-apoptotic effects of mangiferin reduced LC3 expression and the number of autophagosomes. Mangiferin eliminated pathogenic proteins and elevated neuroprotective factors at both mRNA and protein levels, showing a strong neuroprotective effect of mangiferin through anti-inflammatory, anti-autophagy, and anti-apoptotic effects on neurons *in vitro*.

## MATERIALS AND METHODS

### Drugs and antibodies

All drugs, kits, and antibodies used in this study were purchased as listed: mangiferin, Solarbio, China, IM0030; CCK-8 kit, Solarbio, CA1210; IL-1 $\beta$  ELISA kit, Multisciences, China, EK201B; IL-6 ELISA kit, Multisciences, EK2153; TNF $\alpha$  ELISA kit, Multisciences, EK282; Annexin V-FITC/PI kit, BioSharp, China, BL110A; anti-LC3, Proteintech, China, 14600-1-AP; anti-A $\beta$ 42, Bioss, USA, BS0107R; Anti-p-Tau, Affinity, USA, AF3148; Anti-APJ, Affinity, DF13350; Anti-VEGF, Affinity, AF5131; Anti-S100 $\beta$ , Affinity, DF6116; Anti-NSE, Affinity, AF5473.

### Primary hippocampal neuron culture

Neonatal C57BL/6 mice, male, aged 1–2 days and weighing 1 g, were purchased from Jinan Pengyue Experimental Animal Breeding Co., Ltd. (China). Primary cultured hippocampal neurons were prepared from newborn mice of either sex within 24 h after the experiment. Briefly, the hippocampus was dissociated and mechanically and chemically triturated until a single-cell suspension was obtained. The cells collected were seeded in 77% DMEM/F12 basal culture medium supplied with 20% FBS, 2% B27, and 1% P/S complete medium in a humid atmosphere with 5% CO<sub>2</sub> at 37°C.

### CCK-8 assay

The neurons were seeded in 96-well plates and kept in DIV12. Cells were incubated with 5  $\mu$ mol/L, 10  $\mu$ mol/L, 20  $\mu$ mol/L, 40  $\mu$ mol/L, and 60  $\mu$ mol/L of mangiferin for 24 h, then 10  $\mu$ L/well of reaction buffer was added. After 3 h of incubation, the absorbance was measured at 450 nm using a microplate reader. To establish an *in vitro* cell damage model of LPS-induced SAE, cells were exposed to 1  $\mu$ g/ml of LPS and then subjected to a CCK-8 assay.

### ELISA

The neurons were exposed to 1  $\mu$ g/mL LPS and then incubated with 20  $\mu$ mol/L or 40  $\mu$ mol/L mangiferin for 48 h. The supernatants were collected and the concentration of IL-1 $\beta$ , IL-6, and TNF- $\alpha$  was measured by ELISA assay according to the manufacturer's protocol.

### Flow cytometry

Annexin V-FITC and PI staining (Biosharp, BL110A) combined with flow cytometry were performed to assess cell apoptosis. Briefly, cells were harvested by centrifugation at 1000 rpm for 5 min at 4°C after trypsin digestion. After washing with PBS, cells were resuspended with 200  $\mu$ L binding buffer and incubated with 5  $\mu$ L Annexin-FITC and 5  $\mu$ L PI at room temperature for 10 min. Finally, cells were classified using a BD Accuri C6 flow cytometer (excitation = 488 nm; emission = 530 nm).

### Immunofluorescence

The neurons in DIV12 were washed once with CytoBuffer cells (50  $\mu$ mol/L MES (pH 6.1), 5  $\mu$ mol/L MgCl<sub>2</sub>, 3  $\mu$ mol/L EGTA, and 5  $\mu$ mol/L glucose) and then fixed in freshly prepared 4% paraformaldehyde for 40 min at room temperature. To quench autofluorescence, cells were washed twice for 10 min each with 1 mg/mL

**Table 1. Primer sequences used in this study.**

| Primer              | Sequence                        |
|---------------------|---------------------------------|
| Mus GAPDH-F         | 5'-GCCTCCTCCAATTCAACCCT-3'      |
| Mus GAPDH-R         | 5'-CTCGTGGTTCACACCCATCA-3'      |
| Mus A $\beta$ 42-F  | 5'-CCCAAGATCCTGATAAACTTCCCAC-3' |
| Mus A $\beta$ 42-R  | 5'-AGGCTCGACTTCATTTTCGGT-3'     |
| Mus p-Tau-F         | 5'-CCACACGGAGATCCCAGAAG-3'      |
| Mus p-Tau-R         | 5'-GTGTTGGTAGGGATGGGGTG-3'      |
| Mus APJ-F           | 5'-CCCTTCCCCCTCAAACCTTCC-3'     |
| Mus APJ-R           | 5'-CAGCCTTAGGACCAGATGCC-3'      |
| Mus VEGF-F          | 5'-GGGAGTCTGTGCTCTGGGAT-3'      |
| Mus VEGF-R          | 5'-GGTGTCTGTCTGTCTGTCCG-3'      |
| Mus s100 $\beta$ -F | 5'-CTGATCGCCTACACCCTTCC-3'      |
| Mus s100 $\beta$ -R | 5'-CACAGTCCTCGACTCTCAGC-3'      |
| Mus NSE-F           | 5'-GTCGGCATCCAGATAGTGGG-3'      |
| Mus NSE-R           | 5'-AAGGGGATCACAGCACACTG-3'      |

NaBH<sub>4</sub> in TBS (20  $\mu$ mol/L Tris pH 7.5, 154  $\mu$ mol/L NaCl, 2  $\mu$ mol/L EGTA, and 2  $\mu$ mol/L MgCl<sub>2</sub>). Cells were then permeabilized and blocked with TBS containing 2% bovine serum albumin and 0.02% saponin (0.5 mL/well) for 1.5 h. After incubation with primary antibodies overnight at 4°C, the cells were washed three times with TBS and then incubated for 1 h with secondary antibodies. After three washes with TBS, cells were mounted on slides with a mounting medium containing 50% DAPI. Cells were scanned using an inverted fluorescence microscope Olympus (IX73).

### Transmission electron microscope

Cultured cells from different treatment groups were fixed with 2.5% glutaraldehyde for 4 h, followed by secondary fixation with 1% osmium tetroxide for 2 h. The cells were then dehydrated (30%, 50%, 70%, 80%, 85%, 90%, 100% alcohol gradients), infiltrated and embedded with acetone: resin (2:1), acetone: resin (1:1), resin step by step for 8 h in a 37°C incubator. After the samples were polymerized, ultrathin serial 80-nm sections were cut with a Diatome diamond knife using a Leica UC6 ultramicrotome. The sections collected on the grids were stained with 1% uranyl acetate (wt/vol) followed by lead citrate and finally examined and photographed using a transmission electron microscope.

### Western blot

For Western blot, the samples were separated on a 10% SDS-PAGE gel and transferred to a nitrocellulose filter membrane. The membrane was blocked for 1 h with 5% non-fat dried milk (w/v) prepared in PBST (in  $\mu$ mol/L: 135 NaCl, 2.7 KCl, 1.5 KH<sub>2</sub>PO<sub>4</sub>, 8 K<sub>2</sub>HPO<sub>4</sub>, pH 7.2, 0.05% (v/v) Tween 20). After washing with PBST, the

membrane was incubated with the primary antibody in PBST containing 2% bovine serum albumin at 4°C overnight. After three washes with PBST, the secondary antibody was applied at room temperature for 1 h. After three washes with PBST, the membranes were scanned using an Odyssey infrared imaging system (LI-COR Biosciences, USA). A $\beta$ 42 (Bioss, BS0107R, 1:1000); p-Tau (Affinity, AF3148, 1:1000); S100 $\beta$  (Affinity, DF6116, 1:1000); NSE (Affinity, AF5473, 1:1000); APJ (Affinity, DF13350, 1:1000); VEGF (Affinity, AF5131, 1:1000); GAPDH (Affinity, AF7021, 1:5000). Horseradish peroxidase labeled goat anti-rabbit IgG (H + L) (Beyotime Biotech Inc., China, A0208, 1:10000); Horseradish peroxidase labeled goat anti-mouse IgG (H + L) (Beyotime Biotech Inc., A0216, 1:10000).

### RNA extraction and qRT-PCR

RNA extraction and qRT-PCR were performed as previously described. Briefly, total RNA was extracted using TRIZOL (Solarbio, R1100) and chloroform. RNA concentration was measured using a NanoDrop 2000c Spectrophotometer (Thermo Fisher Scientific, Rockford, IL, USA). The cDNA was reverse transcribed from total RNA according to the manufacturer's instructions. Real-time quantitative PCR experiments were performed on a Quant Studio PCR system (Applied Biosystems, Foster City, CA, USA) using SYBR qPCR Master mix (Tolobio, China, 22204-01) with specific gene primers (Table 1). The qRT-PCR reactions were performed as follows: 1 cycle of 95°C for 3 min, 40 cycles of 95°C for 30 s, and 55°C for 20 s. Melting analysis was used to confirm the specificity of the amplicons. Gene expression levels were normalized to GAPDH mRNA levels using the comparative CT method. Three independent experiments were performed in triplicate for each sample.

## Experimental design and statistical analysis

All data from the experiments are presented as mean  $\pm$  SD and statistical analysis was performed using GraphPad Prism software. Statistical comparisons were performed using the two-tailed unpaired *t*-test, one-way ANOVA with Dunnett's analysis, or two-way ANOVA with Sidak analysis. The Sidak's post-hoc test was used. Statistical significance was set at  $P < 0.05$  was considered significant.

## Availability of data and materials

The datasets used and/or analyzed in the current study are available from the corresponding author upon reasonable request.

## RESULTS

### Primary cultured neuron preparation

To obtain high purity and healthy neurons for screening the effective concentration of mangiferin, we examined cultured cells using MAP2 antibody staining. The images in Figure 1 showed almost all the cells were labeled with MAP2 (Figure 1), indicating the high purity of the hippocampal neurons.

### Screening of optimal concentration of mangiferin for cell protection study

To explore the optimal concentration of the protective effectiveness of mangiferin, we checked neuron viability after 24 h of treatment with different doses of mangiferin (5  $\mu\text{mol/L}$ , 10  $\mu\text{mol/L}$ , 20  $\mu\text{mol/L}$ , 40  $\mu\text{mol/L}$ , and 60  $\mu\text{mol/L}$ ) by Cell Counting Kit 8 (CCK-8). The results showed that 20  $\mu\text{mol/L}$  and 40  $\mu\text{mol/L}$  of mangiferin increased cell viability to 109.0% and 104.7%, respectively (Figure 2, one-way ANOVA,  $F = 15.65$ , \*\*\* $P < 0.001$ ) compared to the control group, while 60  $\mu\text{mol/L}$  of mangiferin showed mild cytotoxicity and increased cell viability to 94.7% (\* $P = 0.038$ ). No significant changes in cell viability were observed in the other groups.

### Mangiferin improves cell viability under LPS-exposed conditions

Lipopolysaccharides (LPS), components of the outer membrane of Gram-negative bacteria, are key activators of immune responses during SAE [16]. To test the protective effectiveness of mangiferin, we used 20  $\mu\text{mol/L}$  and 40  $\mu\text{mol/L}$  of mangiferin to counteract neuron injuries induced by 1  $\mu\text{g/mL}$  LPS. With 24 h or 48 h of mangiferin incubation, the CCK-8 assay data

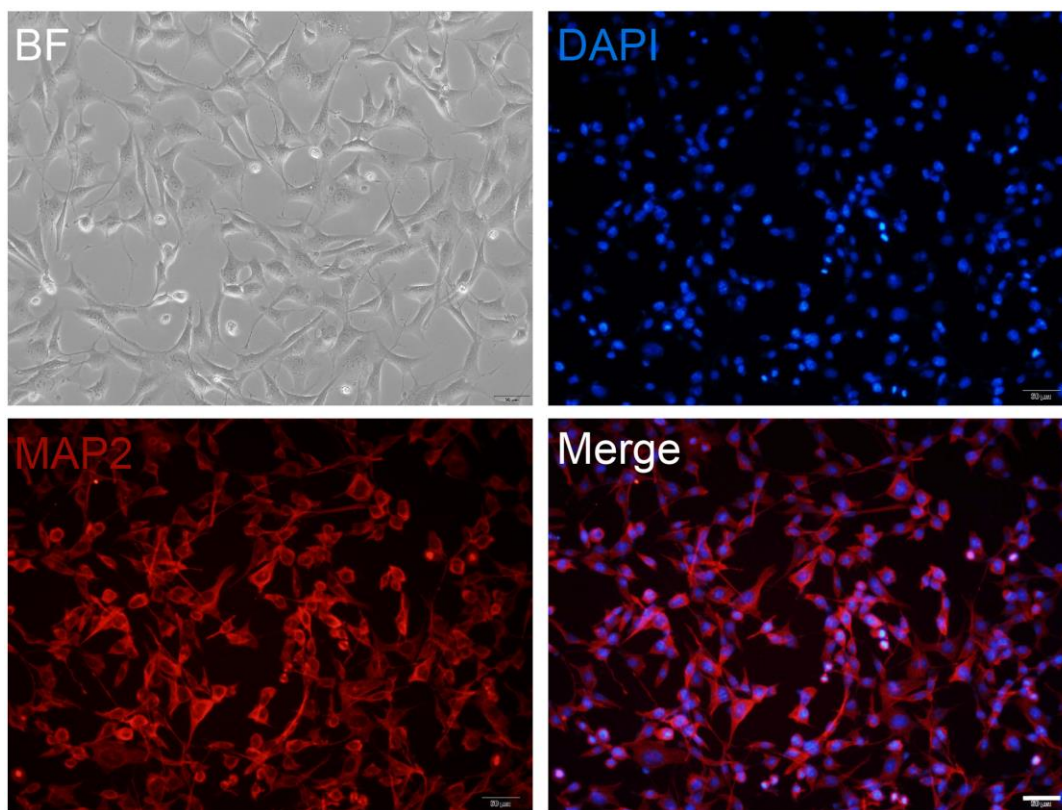

**Figure 1. Primary cultured neuron preparation.** Primary cultured hippocampal neurons are maintained at DIV12 and are observed in a bright field (BF) or stained with MAP2 (red). DAPI (blue) is used as a nuclear marker. Scale bar, 50  $\mu\text{m}$ .

showed that LPS significantly damaged cell viability (Figure 3, 66.41% in 24 h, 61.07% in 48 h,  $***P < 0.001$  compared to the PBS control group); however, mangiferin reversed damage at 20  $\mu\text{mol/L}$  (Figure 3, 76.50% in 24 h, 79.91% in 48 h,  $***P < 0.001$ ) and 40  $\mu\text{mol/L}$  (Figure 3, 81.54% in 24 h, 88.02% in 48 h,  $***P < 0.001$ ). These data strongly supported the idea that 20  $\mu\text{mol/L}$  or 40  $\mu\text{mol/L}$  mangiferin protected neurons from LPS injury.

### Mangiferin shows an anti-inflammatory effect on LPS-exposed cells

LPS treatment induces inflammation, autophagy, and apoptosis [16]. To assess the anti-inflammatory effect of mangiferin, we detected the secretion of inflammatory cytokines after 48 h of 20  $\mu\text{mol/L}$  or 40  $\mu\text{mol/L}$  of mangiferin treatment on LPS-exposed neurons using the ELISA assay. LPS markedly elevated the levels of

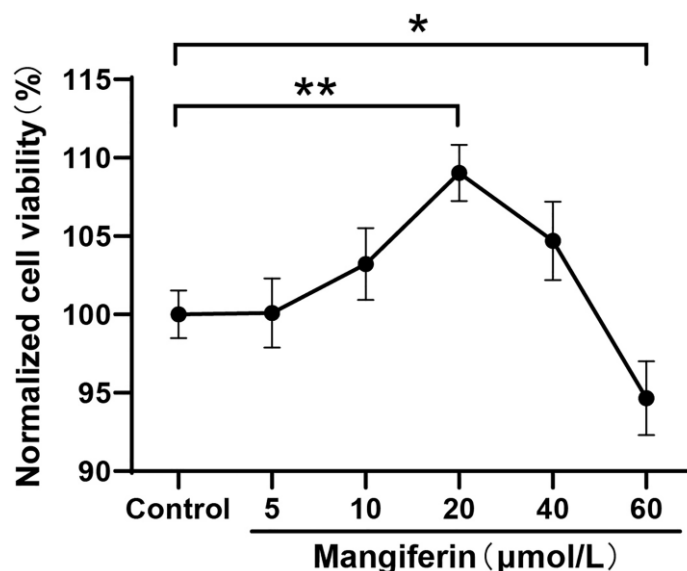

**Figure 2. Neuron viability with different concentrations of mangiferin treatment.** DIV12 neurons are incubated with different doses of mangiferin for 24 h and absorption is measured at 450 nm using a microplate reader. Data are collected from three independent experiments and presented as mean  $\pm$  SD. One-way ANOVA is used for statistical analysis;  $*P < 0.05$ ,  $**P < 0.01$ ,  $***P < 0.001$ .

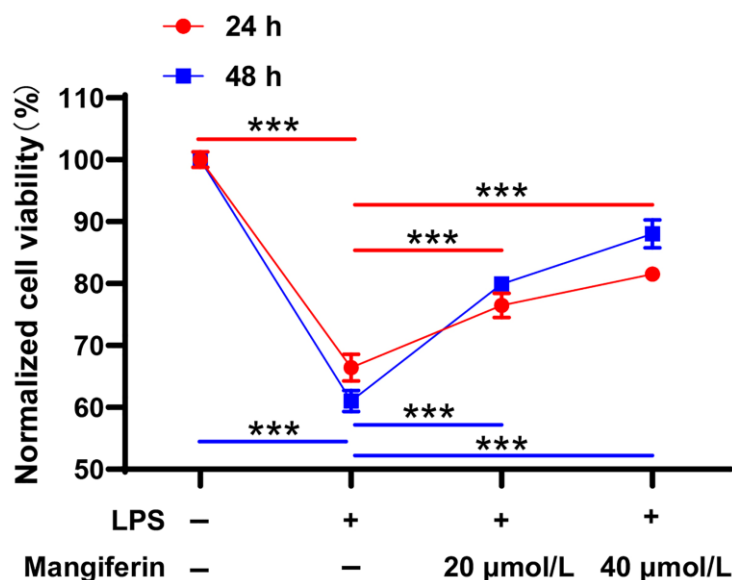

**Figure 3. Mangiferin protects neurons from LPS injury.** LPS-exposed neurons are incubated with 20  $\mu\text{mol/L}$  or 40  $\mu\text{mol/L}$  of mangiferin for 24 h or 48 h and then analyzed with the CCK8 assay. LPS treatment significantly affected cell viability (66.41% in 24 h, 61.07% in 48 h,  $***P < 0.001$  compared to the PBS control group), while 20  $\mu\text{mol/L}$  (76.50% in 24 h, 79.91% in 48 h,  $***P < 0.001$ ) and 40  $\mu\text{mol/L}$  (81.54% in 24 h, 88.02% in 48 h,  $***P < 0.001$ ) of mangiferin countered the LPS-induced phenotype. Data are presented as mean  $\pm$  SD. One-way ANOVA is used for statistical analysis;  $***P < 0.001$ .

IL-1 $\beta$ , IL-6, and TNF- $\alpha$ ; however, 20  $\mu$ mol/L and 40  $\mu$ mol/L of mangiferin markedly alleviated the increase in LPS-induced proinflammatory factor levels (Figure 4, one-way ANOVA for IL-1 $\beta$ , IL-6, and TNF- $\alpha$  analysis;  $F = 160.8$ ,  $***P < 0.001$  for IL-1 $\beta$ ;  $F = 23.91$ ,  $***P = 0.003$  for IL-6;  $F = 980.7$ ,  $***P < 0.001$  for TNF- $\alpha$ ). These results indicated that mangiferin improved the inflammatory response.

### Mangiferin treatment inhibits the autophagy process induced by LPS

Apoptosis is always accompanied by autophagy, and LC3 is a widely accepted molecular marker of autophagy activation. To verify the role that mangiferin played during autophagy, we examined LC3 expression after 48 h of 20  $\mu$ mol/L or 40  $\mu$ mol/L of mangiferin treatment on LPS-exposed neurons by immunofluorescence. Both LC3 positive cells and the fluorescence intensity of LC3 increased substantially (Figure 5), and 20  $\mu$ mol/L and 40  $\mu$ mol/L of mangiferin reversed these phenotypes, indicating that mangiferin inhibited the LPS-induced autophagy process. To directly examine the anti-autophagic effect of mangiferin, we used a transmission electron microscope (TEM) to examine the ultrastructure of autophagosomes. Autophagosomes usually have a vacuolar-like structure of bilayer or multilayer membranes that contain cytoplasmic components such as mitochondria, endoplasmic reticulum, and ribosomes [17]. Consistent with the data of LC3 fluorescence, the number of autophagosomes increased markedly in the LPS group, while 20  $\mu$ mol/L or 40  $\mu$ mol/L of mangiferin alleviated the number of autophagosomes (Figure 6). These data demonstrate the anti-autophagic effect of mangiferin.

### Mangiferin shows an anti-apoptotic effect on LPS-exposed cells

Autophagy is normally protective of cell survival, but excess autophagy leads to apoptosis [18]. To assess the anti-apoptotic effect of mangiferin, we detected cell apoptosis after 48 h of 20  $\mu$ mol/L or 40  $\mu$ mol/L of mangiferin treatment on LPS-exposed neurons by flow cytometry. As shown in Figure 7, LPS exposure significantly increased the apoptosis rate of neurons (Figure 7A, 7B), while 20  $\mu$ mol/L and 40  $\mu$ mol/L of mangiferin reversed LPS-induced neurons apoptosis (Figure 7C, 7D, one-way ANOVA,  $F = 636.8$ ,  $***P < 0.001$ ), showing an anti-apoptotic effect of mangiferin (Figure 7E).

### Mangiferin eliminates pathogenic proteins and increases neuroprotective factors in LPS-challenged cells

Mangiferin has also been reported to be a multi-potent natural product preventing neurodegeneration and sepsis [19]. To detect whether mangiferin could eliminate pathogenic proteins induced by LPS, we observed the mRNA and protein expression of amyloid- $\beta$  (A $\beta$ 42), p-tau, S100 $\beta$ , and neuron-specific enolase (NSE), which are usually adopted to assess the damage to SAE. As shown in Figures 8A–8D and 9A–9E, LPS treatment significantly increased mRNA and protein levels of A $\beta$ 42 and p-tau, S100 $\beta$ , and NSE. Furthermore, the mRNA and protein levels of the cardiovascular system protector apelin-angiotensin receptor-like 1 (APJ, Figures 8E, 9F) and the cell angiogenesis promoter vascular endothelial growth factor A (VEGF, Figures 8F, 9G) decreased significantly, indicating that the cells were severely damaged by LPS. In agreement with the above results,

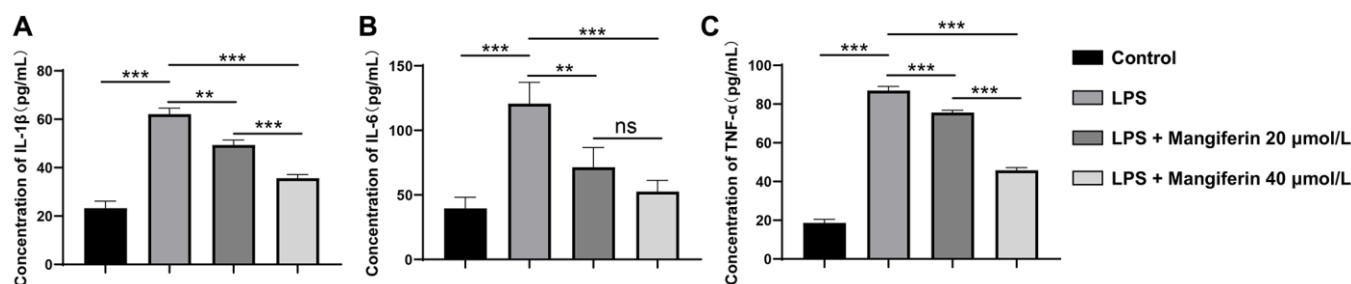

**Figure 4. Anti-inflammatory effect of mangiferin on LPS-exposed cells.** The concentrations of IL-1 $\beta$ , IL-6, and TNF- $\alpha$  in mangiferin-treated culture medium are measured by ELISA assay. Data are presented as mean  $\pm$  SD. One-way ANOVA is used for statistical analysis. (A) Concentrations of IL-1 $\beta$  in control, LPS, 20  $\mu$ mol/L mangiferin with LPS, and 40  $\mu$ mol/L mangiferin with LPS are 23.23 pg/mL, 62.11 pg/mL, 49.37 pg/mL, and 35.64 pg/mL, respectively, all  $***P < 0.001$ . (B) Concentrations of IL-6 in control, LPS, 20  $\mu$ mol/L mangiferin with LPS, 40  $\mu$ mol/L mangiferin with LPS are 39.52 pg/mL, 120.70 pg/mL, 71.41 pg/mL, and 52.57 pg/mL, respectively.  $**P = 0.0066$  for LPS vs. 20  $\mu$ mol/L mangiferin with LPS,  $P = 0.23$  for 20  $\mu$ mol/L mangiferin with LPS vs. 40  $\mu$ mol/L mangiferin with LPS, no significance is observed. All other comparisons are presented as  $***P < 0.001$ . (C) Concentrations of TNF- $\alpha$  in control, LPS, 20  $\mu$ mol/L mangiferin with LPS, and 40  $\mu$ mol/L mangiferin with LPS are 18.61 pg/mL, 86.98 pg/mL, 75.60 pg/mL, and 45.80 pg/mL, respectively, all  $***P < 0.001$ .

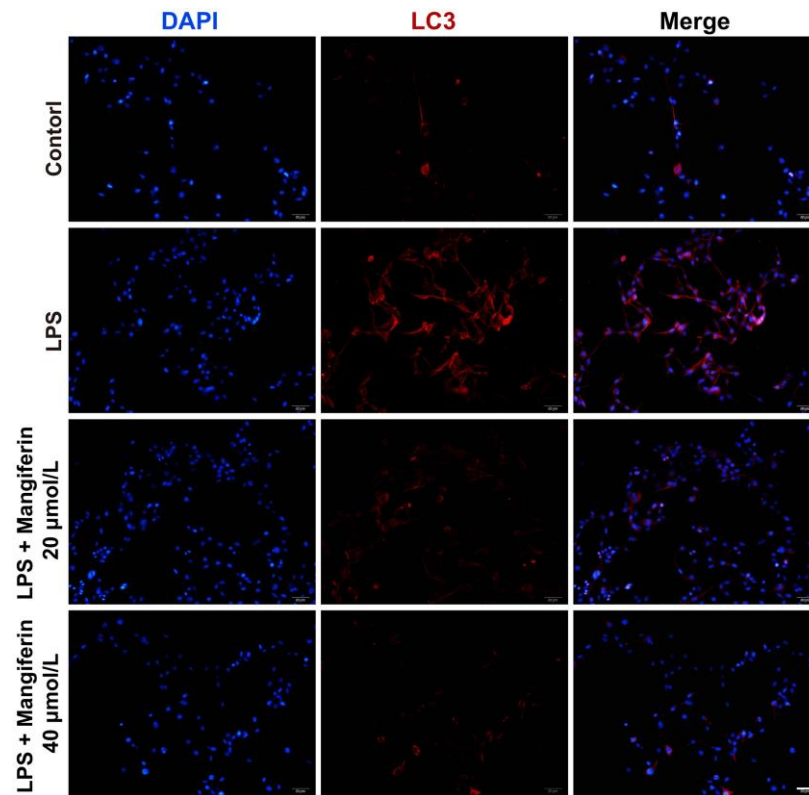

**Figure 5. Mangiferin treatment inhibits the autophagy process induced by LPS.** Neurons are stained with LC3 (red) to label the autophagosomes and DAPI (blue) to mark the nucleus. Scale bars, 50  $\mu$ m.

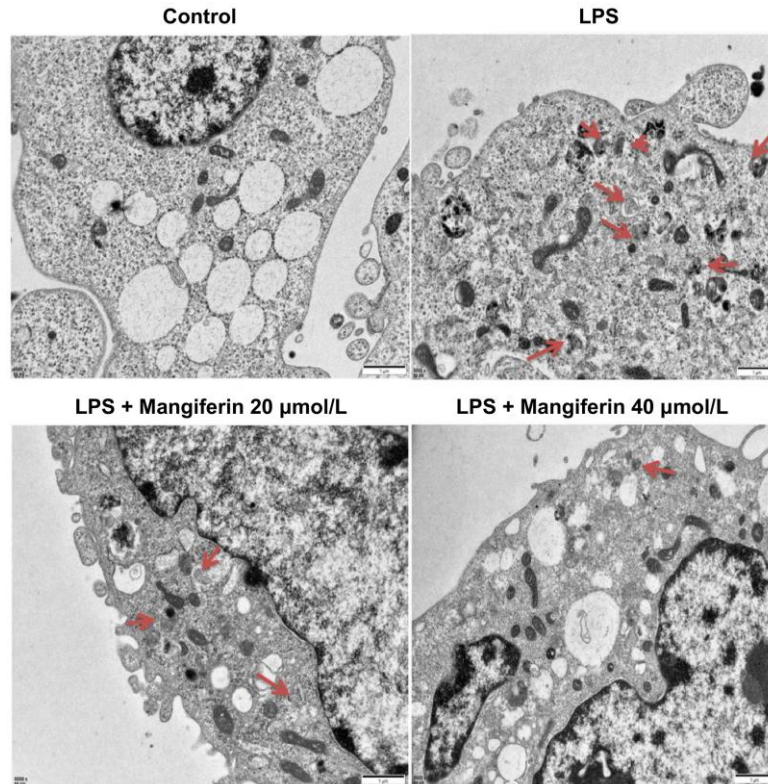

**Figure 6. Mangiferin treatment alleviates the number of autophagosomes induced by LPS by TEM.** Different neuronal treatments were performed for transmission electron microscopy (TEM). Red arrowheads indicate autophagosomes. Scale bars, 1  $\mu$ m.

both 20  $\mu\text{mol/L}$  and 40  $\mu\text{mol/L}$  of mangiferin decreased the mRNA and protein level of pathogenic proteins ( $\text{A}\beta 42$  and p-tau, S100 $\beta$ , and NSE) and increased the mRNA and protein levels of neuroprotective factors (APJ, VEGF), representing the powerful protective effects of mangiferin.

## DISCUSSION

Intraperitoneal (i.p.) injection of lipopolysaccharide (LPS) is a widely accepted method for establishing animal models of sepsis. Increasing *in vivo* studies have

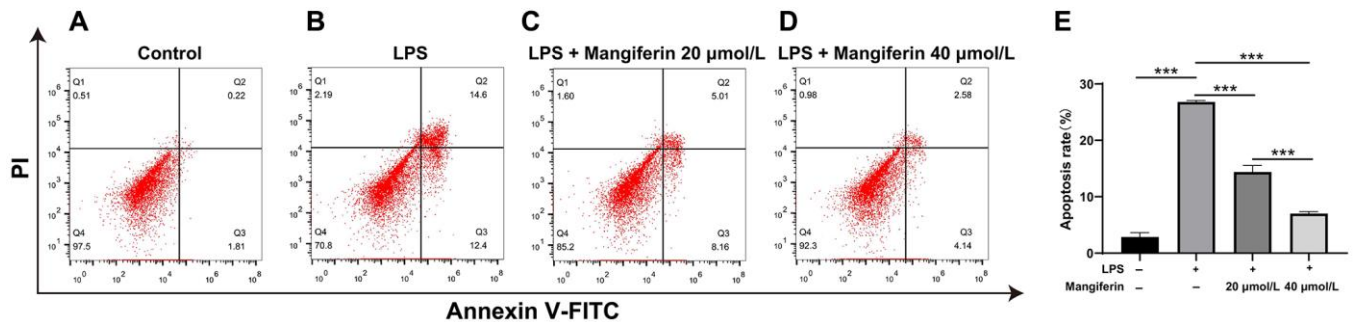

**Figure 7. Mangiferin mediates an anti-apoptotic effect in LPS-exposed cells.** (A–D) The plots show the flow cytometry of different treatments, and the apoptosis rates are analyzed (E). In the plots, quadrant Q4 shows surviving cells, Q2 and Q3 show dead cells, and Q1 shows cell debris; Q2 and Q3 are used to assess apoptosis. The apoptosis rates in the control, LPS, 20  $\mu\text{mol/L}$  mangiferin with LPS, 40  $\mu\text{mol/L}$  mangiferin with LPS are 2.87%, 26.8%, 14.39%, and 7.02% respectively, all  $***P < 0.001$ .

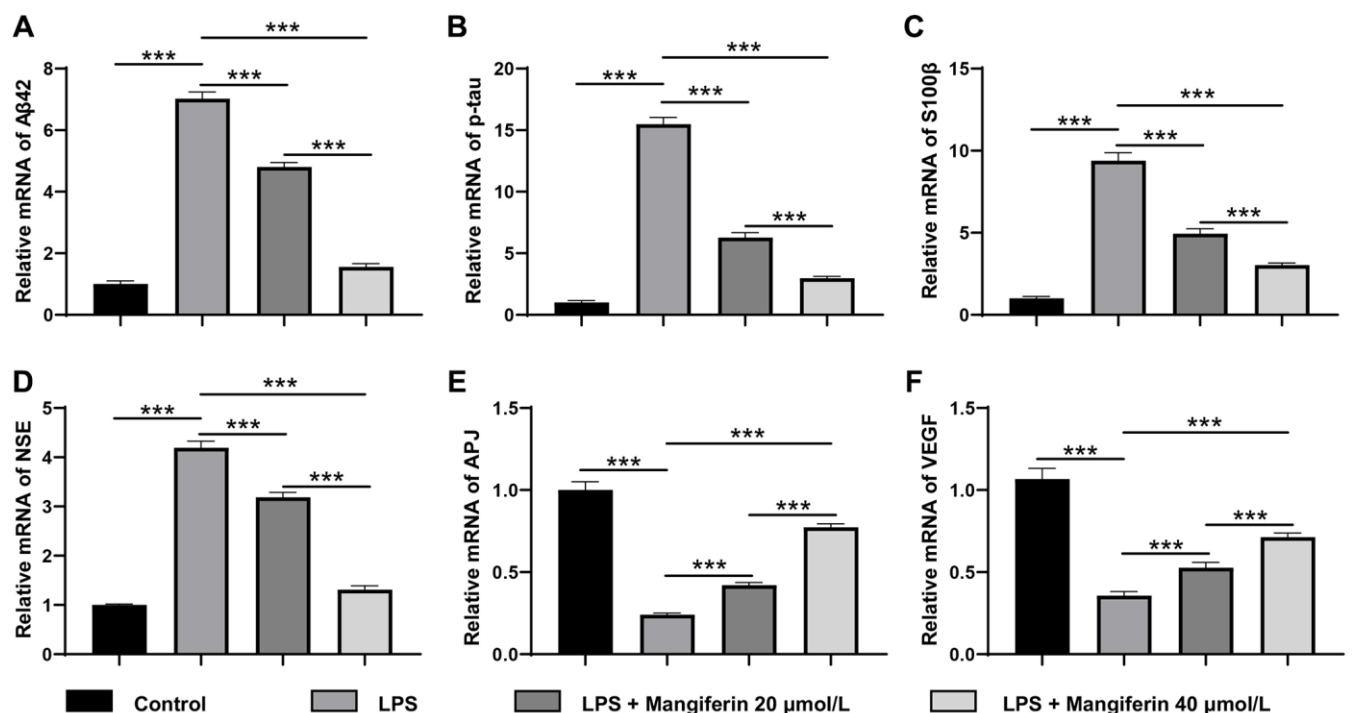

**Figure 8. Mangiferin eliminates pathogenic proteins and increases neuroprotective factors in LPS-challenged cells by RT-PCR.** (A) The relative mRNA levels of  $\text{A}\beta 42$  in LPS, 20  $\mu\text{mol/L}$  mangiferin with LPS, and 40  $\mu\text{mol/L}$  mangiferin with LPS compared to control are 7.02, 4.80, and 1.56 times, respectively, all  $***P < 0.001$ . One-way ANOVA,  $F = 1199$ ,  $***P < 0.001$ . (B) Relative mRNA levels of p-tau in LPS, 20  $\mu\text{mol/L}$  mangiferin with LPS, and 40  $\mu\text{mol/L}$  mangiferin with LPS compared to control are 15.49, 6.27, and 3.00 times, respectively, all  $***P < 0.001$ . One-way ANOVA,  $F = 1013$ ,  $***P < 0.001$ . (C) Relative mRNA levels of S100 $\beta$  in LPS, 20  $\mu\text{mol/L}$  mangiferin with LPS, and 40  $\mu\text{mol/L}$  mangiferin with LPS compared to the control are 9.39, 4.95, and 3.03, respectively, all  $***P < 0.001$ . One-way ANOVA,  $F = 446$ ,  $***P < 0.001$ . (D) Relative mRNA levels of NSE in LPS, 20  $\mu\text{mol/L}$  mangiferin with LPS, 40  $\mu\text{mol/L}$  mangiferin with LPS compared to control were 4.19, 3.19, and 1.31 times, respectively, all  $***P < 0.001$ . One-way ANOVA,  $F = 834$ ,  $***P < 0.001$ . (E) Relative mRNA levels of APJ in LPS, 20  $\mu\text{mol/L}$  mangiferin with LPS, and 40  $\mu\text{mol/L}$  mangiferin with LPS compared to control are 0.24, 0.42, and 0.77 times, respectively, all  $***P < 0.001$ . One-way ANOVA,  $F = 1688$ ,  $***P < 0.001$ . (F) Relative mRNA levels of VEGF in LPS, 20  $\mu\text{mol/L}$  mangiferin with LPS, and 40  $\mu\text{mol/L}$  mangiferin with LPS compared to control are 0.36, 0.53, and 0.71 times, respectively, all  $***P < 0.001$ . One-way ANOVA,  $F = 396$ ,  $***P < 0.001$ .

shown that LPS-induced inflammation causes inappropriate activation of microglia and astrocytes, damages the BBB, and negatively affects mitochondrial function, oxidative/nitrative stress, and apoptosis [20, 21]. Although mangiferin shows excellent protective effects against sepsis-induced lung or kidney injury [14, 15], the neuroprotective effects of mangiferin have not been investigated in LPS-induced sepsis using primary cultured hippocampal neurons. In this study, we screened for the optimal concentration of mangiferin using a CCK-8 assay. The CCK-8 assay was used to investigate the toxicity of mangiferin (5–60  $\mu\text{mol/L}$ ) to neurons; 20  $\mu\text{mol/L}$  and 40  $\mu\text{mol/L}$  mangiferin increased neuron viability, while the higher concentration of mangiferin showed neurotoxicity (Figure 2). Therefore, we applied 20  $\mu\text{mol/L}$  and 40  $\mu\text{mol/L}$  of mangiferin for subsequent experiments. In this LPS-induced neuron damage model, 20  $\mu\text{mol/L}$  and 40  $\mu\text{mol/L}$  of mangiferin not only increased neuron viability (Figure 3), but also markedly alleviated the secretion of inflammatory cytokines (IL-1 $\beta$ , IL-6, and TNF- $\alpha$ ) (Figure 4). These data are consistent with previous results showing that mangiferin has anti-inflammatory effects on LPS-induced inflammatory responses in macrophages [22] and microglia [23], indicating a similar anti-inflammatory effect of mangiferin on LPS-induced neuronal damage.

Autophagy is a conserved degradation process that maintains cellular homeostasis and the clearance of damaged organelles [24] and is always accompanied by cell apoptosis, which is a complex process that can promote cell survival or cell death [22]. In non-neuronal cells, autophagy and apoptosis have been shown to be interconnected by several molecular nodes of crosstalk, enabling the coordinated regulation of cell survival during mild stimulation of autophagy or cell death during excess autophagy [25]. Autophagosome formation is usually monitored by measuring the processing of LC3, a cytosolic protein that, in autophagy induction, is converted from LC3-I to LC3-II by lipid conjugation [26]. Immunofluorescence analysis showed that mangiferin inhibited LPS-induced LC3 expression (Figure 5). Meanwhile, the number of autophagosomes decreased in LPS-treated neurons following administration of mangiferin (Figure 6). However, mangiferin treatment reversed this phenotype, indicating that mangiferin inhibited LPS-induced overactivation of autophagy. Furthermore, flow cytometry showed that mangiferin treatment reversed LPS-induced neuronal apoptosis (Figure 7), suggesting that mangiferin effectively protects neurons from LPS-induced apoptosis. Combined with this part of the work, mangiferin eased neurons from stimulation of LPS, thus protecting neurons from overactivated autophagy and subsequent cell apoptosis.

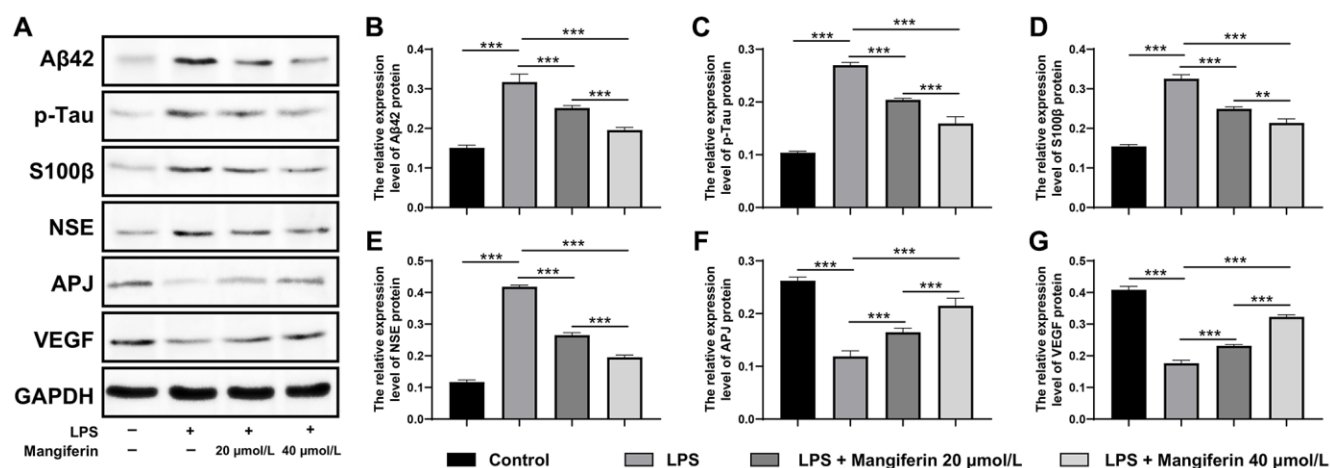

**Figure 9. Mangiferin eliminates pathogenic proteins and elevates neuroprotective factors in LPS-challenged cells by Western blot.** (A) Western blot showed the protein level of A $\beta$ 42, p-tau, S100 $\beta$ , NSE, APJ, and VEGF change with different treatments. (B–G) Quantitative analysis of A, protein levels of A $\beta$ 42 in LPS, 20  $\mu\text{mol/L}$  mangiferin with LPS, 40  $\mu\text{mol/L}$  mangiferin with LPS compared to control were 2.10, 1.67, and 1.30 times, respectively, all  $***P < 0.001$ . One-way ANOVA,  $F = 111.7$ ,  $***P < 0.001$ . Protein levels of p-tau in LPS, 20  $\mu\text{mol/L}$  mangiferin with LPS, 40  $\mu\text{mol/L}$  mangiferin with LPS compared to the control are 2.60, 1.94, and 1.53 times, respectively, all  $***P < 0.001$ . One-way ANOVA,  $F = 285.7$ ,  $***P < 0.001$ . Protein levels of S100 $\beta$  in LPS, 20  $\mu\text{mol/L}$  mangiferin with LPS, and 40  $\mu\text{mol/L}$  mangiferin with LPS compared to the control are 2.11, 1.61, and 1.38 times, respectively,  $**P = 0.0026$  for 20  $\mu\text{mol/L}$  mangiferin with LPS vs. 40  $\mu\text{mol/L}$  mangiferin with LPS. One-way ANOVA,  $F = 241.0$ ,  $***P < 0.001$ . Protein levels of NSE in LPS, 20  $\mu\text{mol/L}$  mangiferin with LPS, 40  $\mu\text{mol/L}$  mangiferin with LPS compared to the control are 3.57, 2.27, and 1.67 times, respectively, all  $***P < 0.001$ . One-way ANOVA,  $F = 990.9$ ,  $***P < 0.001$ . Protein levels of APJ in LPS, 20  $\mu\text{mol/L}$  mangiferin with LPS, 40  $\mu\text{mol/L}$  mangiferin with LPS compared to control are 0.45, 0.63, and 0.82 in fold, respectively,  $**P = 0.0028$  for LPS vs. 20  $\mu\text{mol/L}$  mangiferin with LPS,  $**P = 0.0015$  for 20  $\mu\text{mol/L}$  mangiferin with LPS vs. 40  $\mu\text{mol/L}$  mangiferin with LPS. One-way ANOVA,  $F = 108.3$ ,  $***P < 0.001$ . Protein levels of VEGF in LPS, 20  $\mu\text{mol/L}$  mangiferin with LPS, 40  $\mu\text{mol/L}$  mangiferin with LPS compared to control were 0.43, 0.57, and 0.79 times, respectively, all  $***P < 0.001$ . One-way ANOVA,  $F = 467.7$ ,  $***P < 0.001$ .

Extracellular amyloid- $\beta$  plaques and intracellular tau-containing neurofibrillary tangles were considered a biomarker of Alzheimer's disease [27]. *In vivo* experiments showed that even a single i.p. injection of LPS led to intracellular accumulation of A $\beta$ 42 in hippocampal pyramidal neurons with unknown precise mechanisms [28]. In this LPS-exposed neuron, protein and mRNA levels of these two pathogenic proteins (A $\beta$ 42 and p-tau) increased, as well as two other brain injury biomarkers (S100 $\beta$  and NSE) used mainly in brain trauma, cerebral stroke, SAE, and hypoxic ischemia encephalopathy [29, 30]. Mangiferin not only counteracted the increase in LPS in pathogenic proteins, but also promoted the expression of two protective factors in the cardiovascular system and angiogenesis, APJ and VEGF (Figures 8, 9) [31]. Taken together, mangiferin exerted powerful protective effects against LPS-induced neuronal damage and enhanced neuronal survival through anti-neuroinflammation, anti-autophagy, anti-apoptosis, pathogenic protein elimination, and promotion of neurotrophic factor expression. These findings suggest that mangiferin is a potential therapeutic agent against SAE.

## CONCLUSIONS

Mangiferin exhibited neuroprotective effects in an LPS-induced SAE neuronal model through its anti-neuroinflammatory, anti-autophagic, and anti-apoptotic effects.

## AUTHOR CONTRIBUTIONS

All authors were involved in the design of the project and reviewed and approved the final manuscript. HLT and GJT wrote the first draft of the article, DL was responsible for the final revision and layout of the article, NL was responsible for the literature search and experimental methods, JLZ was responsible for conducting the experiments, and SYZ was responsible for data processing and general notation series.

## CONFLICTS OF INTEREST

The authors declare no conflicts of interest related to this study.

## ETHICAL STATEMENT

This study did not involve clinical experiments related to people. The authors are accountable for all aspects of this work and ensure that questions related to the accuracy or integrity of any part of the work are appropriately investigated and resolved. All animal experiments were conducted in accordance with the project license approved by The Research

Ethics Committee of The Second Hospital of Hebei Medical University (2023-AE235) and the institutional guidelines for the care and use of animals.

## FUNDING

This work was supported by the Hebei Provincial Health Commission Research Fund Project (20242000).

## REFERENCES

1. Ji MH, Gao YZ, Shi CN, Wu XM, Yang JJ. Acute and long-term cognitive impairment following sepsis: mechanism and prevention. *Expert Rev Neurother*. 2023; 23:931–43. <https://doi.org/10.1080/14737175.2023.2250917> PMID:37615511
2. Jarczак D, Kluge S, Nierhaus A. Sepsis-Pathophysiology and Therapeutic Concepts. *Front Med (Lausanne)*. 2021; 8:628302. <https://doi.org/10.3389/fmed.2021.628302> PMID:34055825
3. Sekino N, Selim M, Shehadah A. Sepsis-associated brain injury: underlying mechanisms and potential therapeutic strategies for acute and long-term cognitive impairments. *J Neuroinflammation*. 2022; 19:101. <https://doi.org/10.1186/s12974-022-02464-4> PMID:35488237
4. Pan S, Lv Z, Wang R, Shu H, Yuan S, Yu Y, Shang Y. Sepsis-Induced Brain Dysfunction: Pathogenesis, Diagnosis, and Treatment. *Oxid Med Cell Longev*. 2022; 2022:1328729. <https://doi.org/10.1155/2022/1328729> PMID:36062193
5. Jacobi J. The pathophysiology of sepsis-2021 update: Part 1, immunology and coagulopathy leading to endothelial injury. *Am J Health Syst Pharm*. 2022; 79:329–37. <https://doi.org/10.1093/ajhp/zxab380> PMID:34605875
6. Wilkinson AS, Monteith GR, Shaw PN, Lin CN, Gidley MJ, Roberts-Thomson SJ. Effects of the mango components mangiferin and quercetin and the putative mangiferin metabolite norathyriol on the transactivation of peroxisome proliferator-activated receptor isoforms. *J Agric Food Chem*. 2008; 56:3037–42. <https://doi.org/10.1021/jf800046n> PMID:18393431
7. He L, Peng X, Zhu J, Chen X, Liu H, Tang C, Dong Z, Liu F, Peng Y. Mangiferin attenuate sepsis-induced acute kidney injury via antioxidant and anti-inflammatory effects. *Am J Nephrol*. 2014; 40:441–50.

<https://doi.org/10.1159/000369220>

PMID:25427663

8. Li L, Dong Y, Liu X, Wang M. Mangiferin for the Management of Liver Diseases: A Review. *Foods*. 2023; 12:2469.  
<https://doi.org/10.3390/foods12132469>  
PMID:37444207
9. Zivković J, Kumar KA, Rushendran R, Ilango K, Fahmy NM, El-Nashar HAS, El-Shazly M, Ezzat SM, Melgar-Lalanne G, Romero-Montero A, Peña-Corona SI, Leyva-Gomez G, Sharifi-Rad J, Calina D. Pharmacological properties of mangiferin: bioavailability, mechanisms of action and clinical perspectives. *Naunyn Schmiedeberg's Arch Pharmacol*. 2024; 397:763–81.  
<https://doi.org/10.1007/s00210-023-02682-4>  
PMID:37658210
10. Yap KM, Sekar M, Seow LJ, Gan SH, Bonam SR, Mat Rani NNI, Lum PT, Subramaniyan V, Wu YS, Fuloria NK, Fuloria S. *Mangifera indica* (Mango): A Promising Medicinal Plant for Breast Cancer Therapy and Understanding Its Potential Mechanisms of Action. *Breast Cancer* (Dove Med Press). 2021; 13:471–503.  
<https://doi.org/10.2147/BCTT.S316667>  
PMID:34548817
11. Zajac D, Stasinska A, Delgado R, Pokorski M. Mangiferin and its traversal into the brain. *Adv Exp Med Biol*. 2013; 756:105–11.  
[https://doi.org/10.1007/978-94-007-4549-0\\_14](https://doi.org/10.1007/978-94-007-4549-0_14)  
PMID:22836625
12. Walia V, Chaudhary SK, Kumar Sethiya N. Therapeutic potential of mangiferin in the treatment of various neuropsychiatric and neurodegenerative disorders. *Neurochem Int*. 2021; 143:104939.  
<https://doi.org/10.1016/j.neuint.2020.104939>  
PMID:33346032
13. Yang Z, Weian C, Susu H, Hanmin W. Protective effects of mangiferin on cerebral ischemia-reperfusion injury and its mechanisms. *Eur J Pharmacol*. 2016; 771:145–51.  
<https://doi.org/10.1016/j.ejphar.2015.12.003>  
PMID:26656757
14. Wang Y, Liu Y, Cao Q, Shi X, Lu H, Gao S, Yang R. Metabolomic analysis for the protective effects of mangiferin on sepsis-induced lung injury in mice. *Biomed Chromatogr*. 2018; 32:e4208.  
<https://doi.org/10.1002/bmc.4208>  
PMID:29431198
15. Zhang D, Han S, Zhou Y, Qi B, Wang X. Therapeutic effects of mangiferin on sepsis-associated acute lung and kidney injuries via the downregulation of vascular permeability and protection of inflammatory and oxidative damages. *Eur J Pharm Sci*. 2020; 152:105400.  
<https://doi.org/10.1016/j.ejps.2020.105400>  
PMID:32540472
16. Xaus J, Comalada M, Valledor AF, Lloberas J, López-Soriano F, Argilés JM, Bogdan C, Celada A. LPS induces apoptosis in macrophages mostly through the autocrine production of TNF-alpha. *Blood*. 2000; 95:3823–31.  
PMID:10845916
17. Lőrincz P, Juhász G. Autophagosome-Lysosome Fusion. *J Mol Biol*. 2020; 432:2462–82.  
<https://doi.org/10.1016/j.jmb.2019.10.028>  
PMID:31682838
18. Yamamoto H, Zhang S, Mizushima N. Autophagy genes in biology and disease. *Nat Rev Genet*. 2023; 24:382–400.  
<https://doi.org/10.1038/s41576-022-00562-w>  
PMID:36635405
19. Feng ST, Wang ZZ, Yuan YH, Sun HM, Chen NH, Zhang Y. Mangiferin: A multipotent natural product preventing neurodegeneration in Alzheimer's and Parkinson's disease models. *Pharmacol Res*. 2019; 146:104336.  
<https://doi.org/10.1016/j.phrs.2019.104336>  
PMID:31271846
20. Wang F, Li W, Liu Z, Yu R, Wang D. LPS-induced inflammatory response and apoptosis are mediated by Fra-1 upregulation and binding to YKL-40 in A549 cells. *Exp Ther Med*. 2021; 22:1474.  
<https://doi.org/10.3892/etm.2021.10909>  
PMID:34737814
21. Yücel G, Zhao Z, El-Battrawy I, Lan H, Lang S, Li X, Buljubasic F, Zimmermann WH, Cyganek L, Utikal J, Ravens U, Wieland T, Borggrete M, et al. Lipopolysaccharides induced inflammatory responses and electrophysiological dysfunctions in human-induced pluripotent stem cell derived cardiomyocytes. *Sci Rep*. 2017; 7:2935.  
<https://doi.org/10.1038/s41598-017-03147-4>  
PMID:28592841
22. Feng M, Wei S, Zhang S, Yang Y. Anti-Inflammation and Anti-Pyoptosis Activities of Mangiferin via Suppressing NF-κB/NLRP3/GSDMD Signaling Cascades. *Int J Mol Sci*. 2022; 23:10124.  
<https://doi.org/10.3390/ijms231710124>  
PMID:36077522
23. Lei LY, Wang RC, Pan YL, Yue ZG, Zhou R, Xie P, Tang ZS. Mangiferin inhibited neuroinflammation through regulating microglial polarization and suppressing NF-κB, NLRP3 pathway. *Chin J Nat Med*. 2021; 19:112–9.  
[https://doi.org/10.1016/S1875-5364\(21\)60012-2](https://doi.org/10.1016/S1875-5364(21)60012-2)

PMID:[33641782](#)

24. Gómez-Virgilio L, Silva-Lucero MD, Flores-Morelos DS, Gallardo-Nieto J, Lopez-Toledo G, Abarca-Fernandez AM, Zacapala-Gómez AE, Luna-Muñoz J, Montiel-Sosa F, Soto-Rojas LO, Pacheco-Herrero M, Cardenas-Aguayo MD. Autophagy: A Key Regulator of Homeostasis and Disease: An Overview of Molecular Mechanisms and Modulators. *Cells*. 2022; 11:2262.  
<https://doi.org/10.3390/cells11152262>  
PMID:[35892559](#)
25. Su M, Mei Y, Sinha S. Role of the Crosstalk between Autophagy and Apoptosis in Cancer. *J Oncol*. 2013; 2013:102735.  
<https://doi.org/10.1155/2013/102735>  
PMID:[23840208](#)
26. Mizushima N, Levine B, Cuervo AM, Klionsky DJ. Autophagy fights disease through cellular self-digestion. *Nature*. 2008; 451:1069–75.  
<https://doi.org/10.1038/nature06639>  
PMID:[18305538](#)
27. Busche MA, Hyman BT. Synergy between amyloid- $\beta$  and tau in Alzheimer's disease. *Nat Neurosci*. 2020; 23:1183–93.  
<https://doi.org/10.1038/s41593-020-0687-6>  
PMID:[32778792](#)
28. Ifuku M, Katafuchi T, Mawatari S, Noda M, Miake K, Sugiyama M, Fujino T. Anti-inflammatory/anti-amyloidogenic effects of plasmalogens in lipopolysaccharide-induced neuroinflammation in adult mice. *J Neuroinflammation*. 2012; 9:197.  
<https://doi.org/10.1186/1742-2094-9-197>  
PMID:[22889165](#)
29. Yao B, Zhang LN, Ai YH, Liu ZY, Huang L. Serum S100 $\beta$  is a better biomarker than neuron-specific enolase for sepsis-associated encephalopathy and determining its prognosis: a prospective and observational study. *Neurochem Res*. 2014; 39:1263–9.  
<https://doi.org/10.1007/s11064-014-1308-0>  
PMID:[24760429](#)
30. Hajduková L, Sobek O, Prchalová D, Bílková Z, Koudelková M, Lukášková J, Matuchová I. Biomarkers of Brain Damage: S100B and NSE Concentrations in Cerebrospinal Fluid--A Normative Study. *Biomed Res Int*. 2015; 2015:379071.  
<https://doi.org/10.1155/2015/379071>  
PMID:[26421286](#)
31. Collén A, Bergenheim N, Carlsson L, Chien KR, Hoge S, Gan LM, Fritsche-Danielson R. VEGFA mRNA for regenerative treatment of heart failure. *Nat Rev Drug Discov*. 2022; 21:79–80.  
<https://doi.org/10.1038/s41573-021-00355-6>  
PMID:[34873303](#)
